# Supplementary material for: Analysis of Mycobacterium ulcerans-specific T-cell cytokines for diagnosis of Buruli ulcer disease and as potential indicator for disease progression
Source: PubMed Central journal article supplement (PMC5344519; doi:10.1371/journal.pntd.0005415), 2017-02-27

S4 Fig

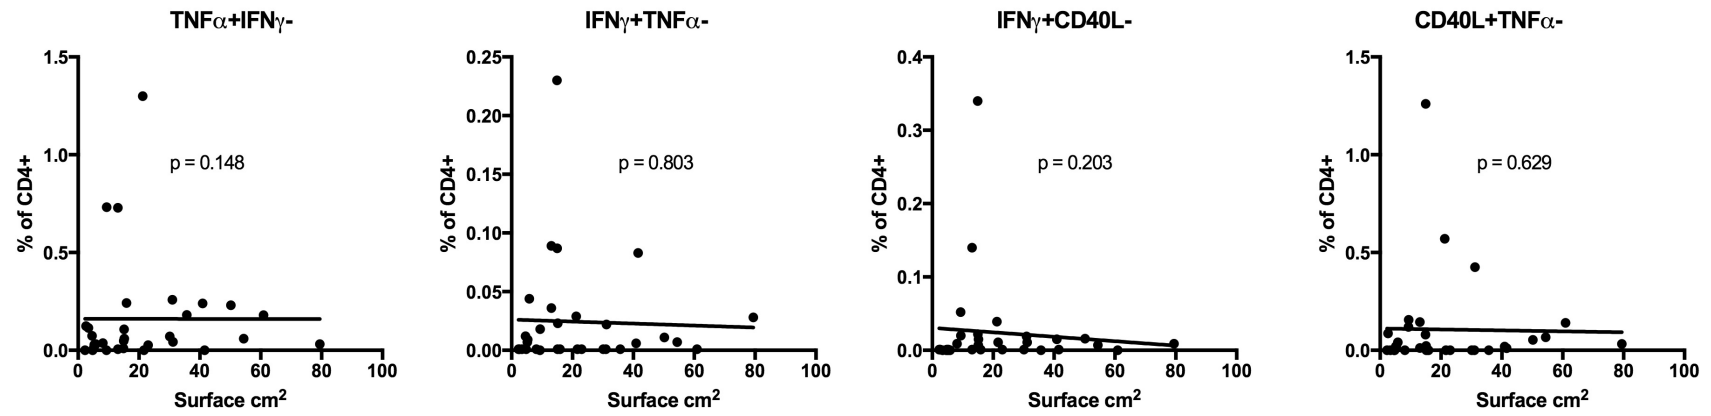

Supplement: pntd.0005415.s004.pdf [file pntd.0005415.s004.pdf]
